# Supplementary material for: Reconstructed Ancestral Myo-Inositol-3-Phosphate Synthases Indicate That Ancestors of the Thermococcales and Thermotoga Species Were More Thermophilic than Their Descendants
Source: PubMed Central journal article supplement (PMC3877268; doi:10.1371/journal.pone.0084300), 2013-12-31

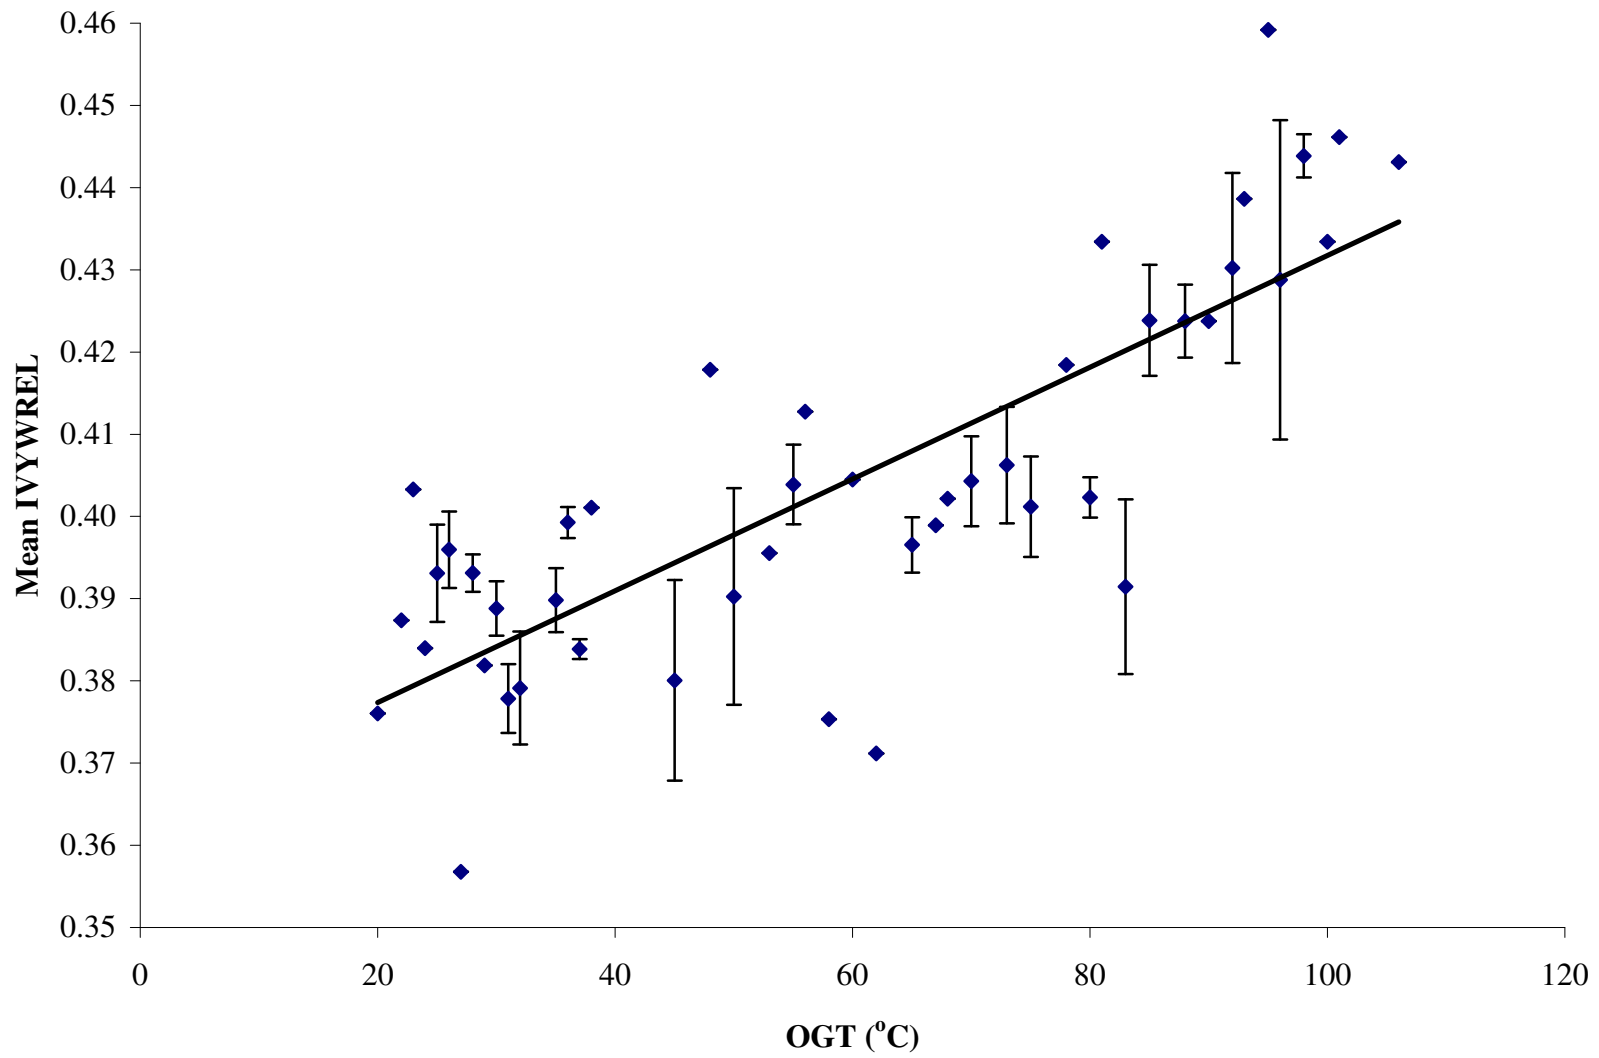

Supplement: pone.0084300.s002.pdf [file pone.0084300.s002.pdf]
