# Supplementary material for: Reconstructed Ancestral Myo-Inositol-3-Phosphate Synthases Indicate That Ancestors of the Thermococcales and Thermotoga Species Were More Thermophilic than Their Descendants
Source: PubMed Central journal article supplement (PMC3877268; doi:10.1371/journal.pone.0084300), 2013-12-31
Supplement: pone.0084300.s003.pdf [file pone.0084300.s003.pdf]

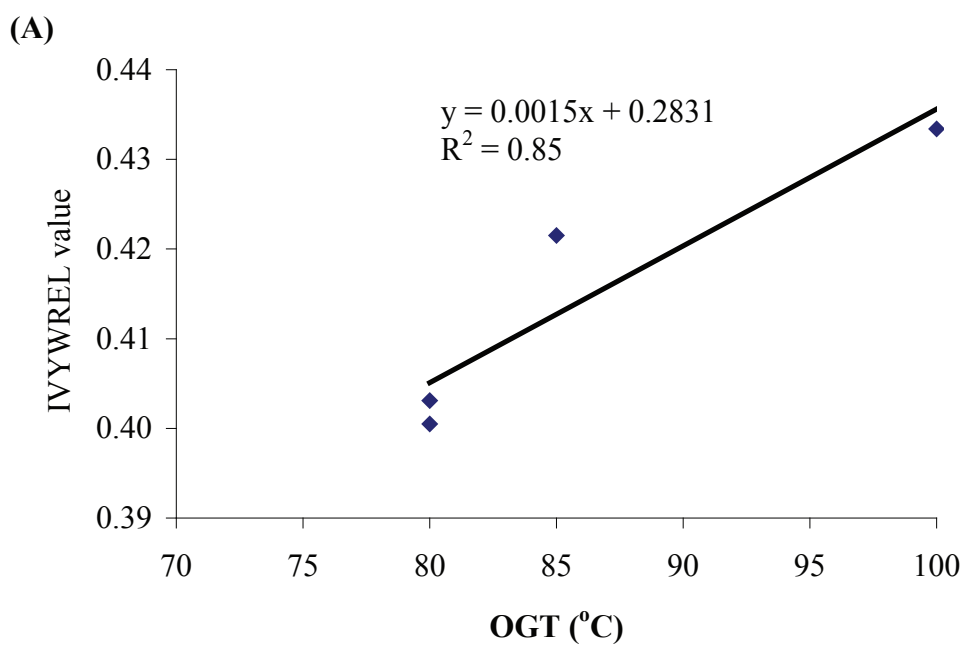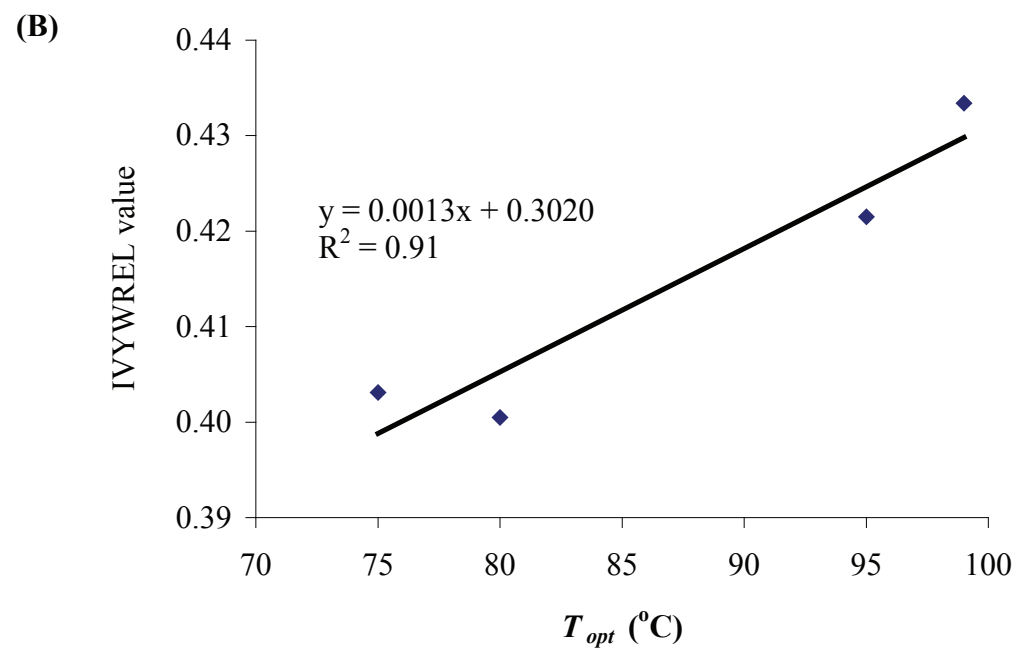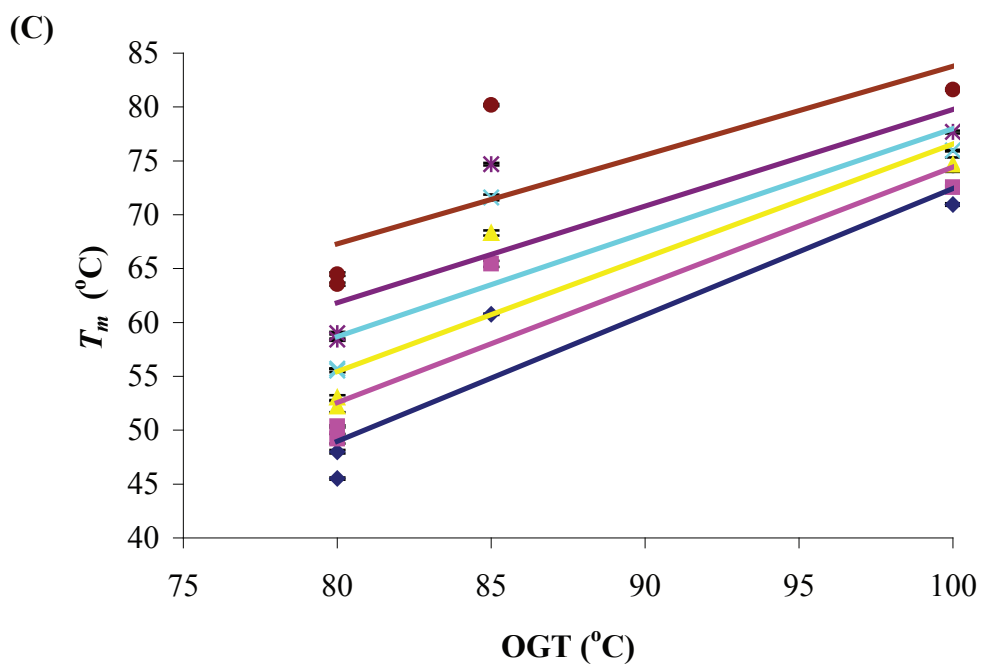

| pH  | Equation                | R <sup>2</sup> |
|-----|-------------------------|----------------|
| 3.6 | $y = 1.1730x - 44.8601$ | 0.88           |
| 3.7 | $y = 1.0930x - 34.8780$ | 0.81           |
| 3.8 | $y = 1.0548x - 28.9286$ | 0.79           |
| 3.9 | $y = 0.9658x - 18.592$  | 0.74           |
| 4.0 | $y = 0.8964x - 9.8658$  | 0.70           |
| 4.2 | $y = 0.8246x + 1.3366$  | 0.64           |

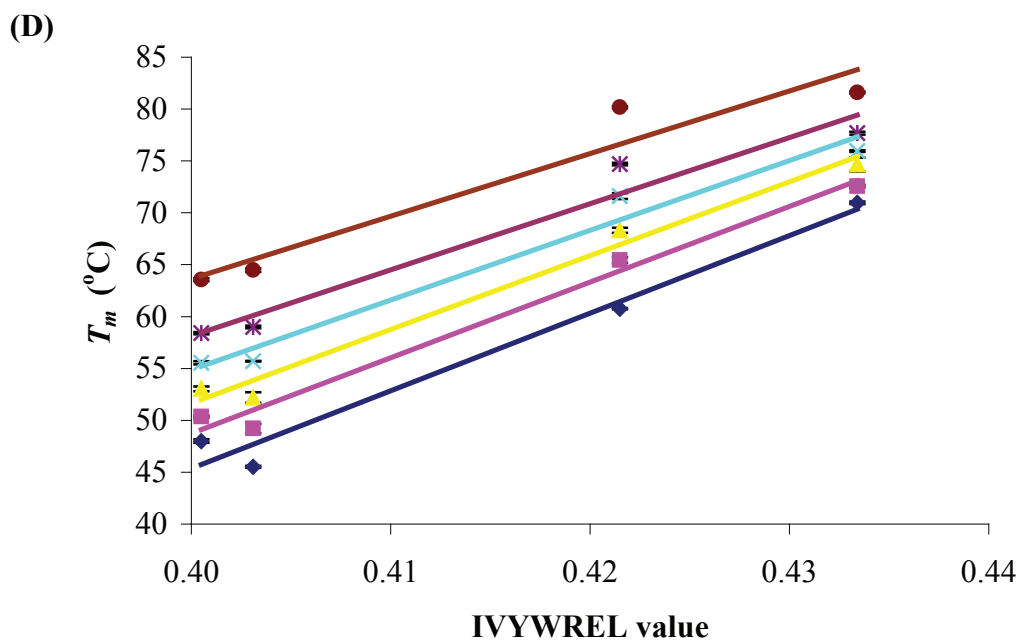

| pH  | Equation               | R <sup>2</sup> |
|-----|------------------------|----------------|
| 3.6 | $y = 747.67x - 253.69$ | 0.97           |
| 3.7 | $y = 729.56x - 243.1$  | 0.98           |
| 3.8 | $y = 711.26x - 232.86$ | 0.98           |
| 3.9 | $y = 671.71x - 213.8$  | 0.97           |
| 4.0 | $y = 637.84x - 197.02$ | 0.96           |
| 4.2 | $y = 604.32x - 178.11$ | 0.93           |

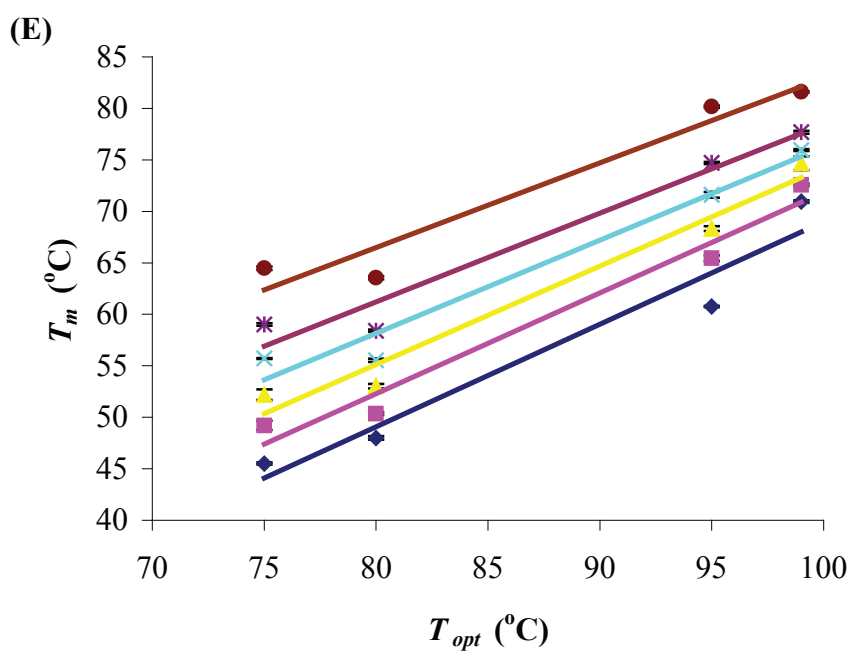

| pH  | Equation               | R <sup>2</sup> |
|-----|------------------------|----------------|
| 3.6 | $y = 0.9958x - 30.577$ | 0.95           |
| 3.7 | $y = 0.9784x - 25.968$ | 0.97           |
| 3.8 | $y = 0.9551x - 21.286$ | 0.97           |
| 3.9 | $y = 0.9041x - 14.175$ | 0.97           |
| 4.0 | $y = 0.8618x - 7.742$  | 0.96           |
| 4.2 | $y = 0.8222x + 0.7159$ | 0.95           |
